# Supplementary material
Source: Research Square preprint supplement (doi:10.21203/rs.3.rs-8887385/v1)
Supplement: Supplementary file 1 [file 29d335340d187a85d9a6014c.docx]

| 1. ({1}) identified as a possible match for Country affiliation for the author(s) (Aff1||Pakistan). | The country name “Pakistan” has now been added to the author affiliation in the manuscript. |
| --- | --- |
| 2. Please provide a Funding Declaration in the manuscript. If there was no Funding, please state so. | A funding statement has been added to the manuscript under the Funding section. The following statement has been included: “The authors received no specific funding for this work.” |
| 3. If your study is a clinical trial, please provide the necessary registration details (registry, trial registration number, and data of registration). If not applicable, please state following in the manuscript: ‘Clinical trial number: not applicable.’ | As this study is not a clinical trial, the following statement has been added in the Methods/Ethics section:  “Clinical trial number: not applicable.” |
| 4. The location of Table Citation (Table 3) is not clear in the manuscript file. Indicate in the manuscript where the table should appear. | Line 468-469. |
| 5. The location of Table Citation (Table 4) is not clear in the manuscript file. Indicate in the manuscript where the table should appear. | Line 479-480 |
| 6. The Citation for Reference (Esther et al. 2014) is missing in the manuscript. Ensure that each reference corresponds to at least one in-text citation. | Line 685-689 |
| 7. The Citation for Reference (Katharina & Peter 2023) is missing in the manuscript. Ensure that each reference corresponds to at least one in-text citation. | 705-707 |
